# Supplementary material
Source: PubMed Central journal article supplement (PMC8530397)
Supplement: sbab078_suppl_supplementary_material.pdf [file sbab078_suppl_supplementary_material.pdf]

12

## Supplementary Information

## Supplementary Table

Table S1

*All study arms with references*

| Study Arm                    | Year | Sample Size | Drug          | Weight | Prolactin | QTc |
|------------------------------|------|-------------|---------------|--------|-----------|-----|
| Ishigooka 2018 <sup>53</sup> | 2018 | 116         | Placebo       | Yes    | Yes       | No  |
| Ishigooka 2018 <sup>53</sup> | 2018 | 228         | Brexpiprazole | Yes    | Yes       | No  |
| Litman 2016 <sup>41</sup>    | 2016 | 55          | Placebo       | Yes    | Yes       | No  |
| Litman 2016 <sup>41</sup>    | 2016 | 31          | Risperidone   | Yes    | Yes       | No  |
| NCT01104766a <sup>64</sup>   | 2015 | 153         | Placebo       | Yes    | Yes       | No  |
| NCT01104766a <sup>64</sup>   | 2015 | 152         | Aripiprazole  | Yes    | Yes       | No  |
| NCT01104766b <sup>64</sup>   | 2015 | 312         | Cariprazine   | Yes    | Yes       | No  |
| Lieberman 2015 <sup>75</sup> | 2015 | 85          | Placebo       | Yes    | Yes       | No  |
| Lieberman 2015 <sup>75</sup> | 2015 | 82          | Risperidone   | Yes    | Yes       | No  |
| Kane 2015 <sup>123</sup>     | 2015 | 184         | Placebo       | Yes    | Yes       | Yes |
| Kane 2015 <sup>123</sup>     | 2015 | 370         | Brexpiprazole | Yes    | Yes       | Yes |
| Correll 2015 <sup>54</sup>   | 2015 | 184         | Placebo       | Yes    | Yes       | Yes |
| Correll 2015 <sup>54</sup>   | 2015 | 362         | Brexpiprazole | Yes    | Yes       | Yes |
| NCT01098110 <sup>82</sup>    | 2015 | 174         | Placebo       | Yes    | Yes       | No  |
| NCT01098110 <sup>82</sup>    | 2015 | 358         | Asenapine     | Yes    | Yes       | No  |
| NCT01617187a <sup>49</sup>   | 2015 | 113         | Asenapine     | Yes    | No        | No  |
| NCT01617187a <sup>49</sup>   | 2015 | 103         | Placebo       | Yes    | No        | No  |
| NCT01617187b <sup>49</sup>   | 2015 | 46          | Olanzapine    | Yes    | No        | No  |
| NCT00905307a <sup>94</sup>   | 2015 | 50          | Aripiprazole  | Yes    | Yes       | No  |
| NCT00905307a <sup>94</sup>   | 2015 | 95          | Placebo       | Yes    | Yes       | No  |
| NCT00905307b <sup>94</sup>   | 2015 | 90          | Brexpiprazole | Yes    | Yes       | No  |
| Loebel 2015a <sup>92</sup>   | 2015 | 199         | Lurasidone    | Yes    | Yes       | No  |
| Loebel 2015a <sup>92</sup>   | 2015 | 112         | Placebo       | Yes    | Yes       | No  |
| Litmann 2014 <sup>93</sup>   | 2014 | 41          | Placebo       | Yes    | No        | No  |
| Litmann 2014 <sup>93</sup>   | 2014 | 22          | Olanzapine    | Yes    | No        | No  |
| Schmidt 2014 <sup>98</sup>   | 2014 | 93          | Olanzapine    | Yes    | Yes       | No  |
| Shen 2014 <sup>81</sup>      | 2014 | 78          | Placebo       | Yes    | No        | No  |
| Shen 2014 <sup>81</sup>      | 2014 | 77          | Olanzapine    | Yes    | No        | No  |
| Durgam 2014a <sup>77</sup>   | 2014 | 151         | Placebo       | Yes    | Yes       | Yes |
| Durgam 2014a <sup>77</sup>   | 2014 | 140         | Risperidone   | Yes    | Yes       | Yes |
| Durgam 2014b <sup>77</sup>   | 2014 | 438         | Cariprazine   | Yes    | Yes       | Yes |
| Geffen 2012 <sup>99</sup>    | 2012 | 91          | Risperidone   | No     | Yes       | No  |
| Geffen 2012 <sup>99</sup>    | 2012 | 93          | Placebo       | No     | Yes       | No  |
| Kinon 2011 <sup>50</sup>     | 2011 | 62          | Olanzapine    | Yes    | Yes       | No  |
| Kinon 2011 <sup>50</sup>     | 2011 | 122         | Placebo       | Yes    | Yes       | No  |
| Kane 2010a <sup>67</sup>     | 2010 | 115         | Haloperidol   | Yes    | Yes       | No  |
| Kane 2010a <sup>67</sup>     | 2010 | 123         | Placebo       | Yes    | Yes       | No  |
| Kane 2010b <sup>67</sup>     | 2010 | 220         | Asenapine     | Yes    | Yes       | No  |
| Study 006 <sup>45</sup>      | 2010 | 99          | Lurasidone    | Yes    | Yes       | Yes |
| Study 006 <sup>45</sup>      | 2010 | 50          | Placebo       | Yes    | Yes       | Yes |
| Study 049a <sup>88</sup>     | 2010 | 73          | Haloperidol   | Yes    | Yes       | Yes |
| Study 049a <sup>88</sup>     | 2010 | 72          | Placebo       | Yes    | Yes       | Yes |
| Study 049b <sup>88</sup>     | 2010 | 140         | Lurasidone    | Yes    | Yes       | Yes |
| Study 196 <sup>57</sup>      | 2010 | 90          | Placebo       | Yes    | Yes       | Yes |
| Study 196 <sup>57</sup>      | 2010 | 90          | Lurasidone    | Yes    | Yes       | Yes |
| Study 229 <sup>78</sup>      | 2010 | 372         | Lurasidone    | Yes    | Yes       | Yes |

## VARIABILITY OF SIDE EFFECTS

| Study Arm                         | Year | Sample Size | Drug         | Weight | Prolactin | QTc |
|-----------------------------------|------|-------------|--------------|--------|-----------|-----|
| Study 229 <sup>78</sup>           | 2010 | 128         | Placebo      | Yes    | Yes       | Yes |
| Study 231a <sup>86</sup>          | 2010 | 116         | Placebo      | Yes    | Yes       | Yes |
| Study 231a <sup>86</sup>          | 2010 | 123         | Olanzapine   | Yes    | Yes       | Yes |
| Study 231b <sup>86</sup>          | 2010 | 239         | Lurasidone   | Yes    | Yes       | Yes |
| Study 233a <sup>85</sup>          | 2010 | 122         | Placebo      | Yes    | Yes       | Yes |
| Study 233a <sup>85</sup>          | 2010 | 120         | Quetiapine   | Yes    | Yes       | Yes |
| Study 233b <sup>85</sup>          | 2010 | 246         | Lurasidone   | Yes    | Yes       | Yes |
| Garcia 2009 <sup>42</sup>         | 2009 | 60          | Haloperidol  | Yes    | Yes       | Yes |
| Garcia 2009 <sup>42</sup>         | 2009 | 64          | Placebo      | Yes    | Yes       | Yes |
| Hera 041-021a <sup>124</sup>      | 2009 | 208         | Asenapine    | No     | Yes       | No  |
| Hera 041-021a <sup>124</sup>      | 2009 | 106         | Placebo      | No     | Yes       | No  |
| Hera 041-021b <sup>124</sup>      | 2009 | 103         | Olanzapine   | No     | Yes       | No  |
| Hera 041-022 <sup>125</sup>       | 2009 | 93          | Olanzapine   | No     | Yes       | No  |
| Hera 041-022 <sup>125</sup>       | 2009 | 93          | Placebo      | No     | Yes       | No  |
| Casey 2008 <sup>72</sup>          | 2008 | 120         | Risperidone  | Yes    | Yes       | No  |
| Casey 2008 <sup>72</sup>          | 2008 | 119         | Placebo      | Yes    | Yes       | No  |
| Cutler 2008a <sup>60</sup>        | 2008 | 151         | Ziprasidone  | Yes    | Yes       | Yes |
| Cutler 2008a <sup>60</sup>        | 2008 | 152         | Placebo      | Yes    | Yes       | Yes |
| Cutler 2008b <sup>60</sup>        | 2008 | 303         | Iloperidone  | Yes    | Yes       | Yes |
| Johnson NCT00397033 <sup>90</sup> | 2008 | 209         | Paliperidone | Yes    | Yes       | No  |
| Johnson NCT00397033 <sup>90</sup> | 2008 | 107         | Placebo      | Yes    | Yes       | No  |
| Johnson NCT00412373 <sup>87</sup> | 2008 | 95          | Placebo      | Yes    | Yes       | No  |
| Johnson NCT00412373 <sup>87</sup> | 2008 | 216         | Paliperidone | Yes    | Yes       | No  |
| Johnson NCT00524043 <sup>48</sup> | 2008 | 70          | Paliperidone | Yes    | Yes       | No  |
| Johnson NCT00524043 <sup>48</sup> | 2008 | 65          | Placebo      | Yes    | Yes       | No  |
| Lindenmayer 2008 <sup>95</sup>    | 2008 | 267         | Quetiapine   | Yes    | Yes       | Yes |
| Lindenmayer 2008 <sup>95</sup>    | 2008 | 84          | Placebo      | Yes    | Yes       | Yes |
| Study 3000a <sup>56</sup>         | 2008 | 127         | Placebo      | Yes    | Yes       | Yes |
| Study 3000a <sup>56</sup>         | 2008 | 124         | Haloperidol  | Yes    | Yes       | Yes |
| Study 3000b <sup>56</sup>         | 2008 | 124         | Iloperidone  | Yes    | Yes       | Yes |
| Study 3004a <sup>56</sup>         | 2008 | 156         | Placebo      | Yes    | Yes       | Yes |
| Study 3004a <sup>56</sup>         | 2008 | 154         | Iloperidone  | Yes    | Yes       | Yes |
| Study 3004b <sup>56</sup>         | 2008 | 153         | Risperidone  | Yes    | Yes       | Yes |
| Study 3005a <sup>56</sup>         | 2008 | 157         | Risperidone  | Yes    | No        | Yes |
| Study 3005a <sup>56</sup>         | 2008 | 160         | Placebo      | Yes    | No        | Yes |
| Study 3005b <sup>56</sup>         | 2008 | 389         | Iloperidone  | Yes    | No        | Yes |
| Study RGH-MD-03 <sup>47</sup>     | 2008 | 130         | Placebo      | Yes    | Yes       | No  |
| Study RGH-MD-03 <sup>47</sup>     | 2008 | 128         | Cariprazine  | Yes    | Yes       | No  |
| Cutler 2008a <sup>60</sup>        | 2008 | 117         | Placebo      | Yes    | Yes       | Yes |
| Cutler 2008a <sup>60</sup>        | 2008 | 448         | Quetiapine   | Yes    | Yes       | Yes |
| Davidson 2007a <sup>46</sup>      | 2007 | 123         | Placebo      | Yes    | Yes       | No  |
| Davidson 2007a <sup>46</sup>      | 2007 | 128         | Olanzapine   | Yes    | Yes       | No  |
| Davidson 2007b <sup>46</sup>      | 2007 | 125         | Paliperidone | Yes    | Yes       | No  |
| Kahn 2007 <sup>44</sup>           | 2007 | 118         | Placebo      | Yes    | Yes       | No  |
| Kahn 2007 <sup>44</sup>           | 2007 | 470         | Quetiapine   | Yes    | Yes       | No  |
| McEvoy 2007b <sup>83</sup>        | 2007 | 206         | Aripiprazole | Yes    | Yes       | No  |
| McEvoy 2007b <sup>83</sup>        | 2007 | 108         | Placebo      | Yes    | Yes       | No  |
| Meltzer 2007a <sup>65</sup>       | 2007 | 149         | Placebo      | Yes    | Yes       | No  |
| Meltzer 2007a <sup>65</sup>       | 2007 | 154         | Risperidone  | Yes    | Yes       | No  |
| Kane 2007b <sup>84</sup>          | 2007 | 127         | Placebo      | Yes    | Yes       | No  |
| Kane 2007b <sup>84</sup>          | 2007 | 128         | Olanzapine   | Yes    | Yes       | No  |
| Kane 2007c <sup>84</sup>          | 2007 | 375         | Paliperidone | Yes    | Yes       | No  |

| Study Arm                        | Year | Sample Size | Drug           | Weight | Prolactin | QTc |
|----------------------------------|------|-------------|----------------|--------|-----------|-----|
| Marder 2007c <sup>79</sup>       | 2007 | 110         | Placebo        | Yes    | Yes       | Yes |
| Marder 2007c <sup>79</sup>       | 2007 | 224         | Paliperidone   | Yes    | Yes       | Yes |
| Marder 2007d <sup>79</sup>       | 2007 | 110         | Olanzapine     | Yes    | Yes       | Yes |
| Patil 2007 <sup>74</sup>         | 2007 | 34          | Olanzapine     | Yes    | Yes       | Yes |
| Patil 2007 <sup>74</sup>         | 2007 | 63          | Placebo        | Yes    | Yes       | Yes |
| Potkin 2007d <sup>58</sup>       | 2007 | 62          | Placebo        | Yes    | Yes       | Yes |
| Potkin 2007d <sup>58</sup>       | 2007 | 60          | Risperidone    | Yes    | Yes       | Yes |
| Potkin 2007c <sup>58</sup>       | 2007 | 60          | Asenapine      | Yes    | Yes       | Yes |
| Potkin 2003a <sup>76</sup>       | 2003 | 202         | Aripiprazole   | Yes    | Yes       | Yes |
| Potkin 2003a <sup>76</sup>       | 2003 | 103         | Placebo        | Yes    | Yes       | Yes |
| Potkin 2003b <sup>76</sup>       | 2003 | 99          | Risperidone    | Yes    | Yes       | Yes |
| Kane 2002b <sup>68</sup>         | 2002 | 104         | Haloperidol    | Yes    | Yes       | Yes |
| Study 94202 2002a <sup>126</sup> | 2002 | 61          | Aripiprazole   | No     | Yes       | Yes |
| Study 94202 2002a <sup>126</sup> | 2002 | 64          | Placebo        | No     | Yes       | Yes |
| Study 94202 2002b <sup>126</sup> | 2002 | 63          | Haloperidol    | No     | Yes       | Yes |
| Study 115 2000a <sup>127</sup>   | 2000 | 83          | Placebo        | No     | No        | Yes |
| Study 115 2000a <sup>127</sup>   | 2000 | 164         | Ziprasidone    | No     | No        | Yes |
| Study 115 2000b <sup>127</sup>   | 2000 | 85          | Haloperidol    | No     | No        | Yes |
| Daniel 1999 <sup>70</sup>        | 1999 | 92          | Placebo        | Yes    | No        | Yes |
| Daniel 1999 <sup>70</sup>        | 1999 | 104         | Ziprasidone    | Yes    | No        | Yes |
| Arvanitis 1997a <sup>52</sup>    | 1997 | 51          | Placebo        | Yes    | Yes       | Yes |
| Arvanitis 1997a <sup>52</sup>    | 1997 | 105         | Quetiapine     | Yes    | Yes       | Yes |
| Arvanitis 1997b <sup>52</sup>    | 1997 | 52          | Haloperidol    | Yes    | Yes       | Yes |
| Small 1997 <sup>97</sup>         | 1997 | 96          | Quetiapine     | No     | Yes       | No  |
| Small 1997 <sup>97</sup>         | 1997 | 96          | Placebo        | No     | Yes       | No  |
| Zimbroff 1997a <sup>100</sup>    | 1997 | 144         | Sertindole     | No     | Yes       | Yes |
| Zimbroff 1997a <sup>100</sup>    | 1997 | 73          | Placebo        | No     | Yes       | Yes |
| Zimbroff 1997b <sup>100</sup>    | 1997 | 137         | Haloperidol    | No     | Yes       | Yes |
| Beasley 1996a <sup>89</sup>      | 1996 | 50          | Placebo        | Yes    | Yes       | No  |
| Beasley 1996a <sup>89</sup>      | 1996 | 50          | Olanzapine     | Yes    | Yes       | No  |
| Beasley 1996b <sup>91</sup>      | 1996 | 69          | Haloperidol    | Yes    | Yes       | Yes |
| Beasley 1996b <sup>91</sup>      | 1996 | 68          | Placebo        | Yes    | Yes       | Yes |
| Beasley 1996c <sup>91</sup>      | 1996 | 133         | Olanzapine     | Yes    | Yes       | Yes |
| Borison 1996 <sup>62</sup>       | 1996 | 55          | Placebo        | Yes    | Yes       | Yes |
| Borison 1996 <sup>62</sup>       | 1996 | 54          | Quetiapine     | Yes    | Yes       | Yes |
| van Kammen 1996 <sup>51</sup>    | 1996 | 105         | Sertindole     | Yes    | Yes       | Yes |
| van Kammen 1996 <sup>51</sup>    | 1996 | 48          | Placebo        | Yes    | Yes       | Yes |
| Zborowski 1995a <sup>55</sup>    | 1995 | 116         | Placebo        | Yes    | Yes       | Yes |
| Zborowski 1995a <sup>55</sup>    | 1995 | 115         | Haloperidol    | Yes    | Yes       | Yes |
| Zborowski 1995b <sup>55</sup>    | 1995 | 117         | Sertindole     | Yes    | Yes       | Yes |
| Clark 1972a <sup>43</sup>        | 1972 | 19          | Chlorpromazine | Yes    | No        | No  |
| Clark 1972a <sup>43</sup>        | 1972 | 18          | Placebo        | Yes    | No        | No  |
| Clark 1972b <sup>43</sup>        | 1972 | 18          | Loxapine       | Yes    | No        | No  |
| Clark 1970a <sup>61</sup>        | 1970 | 15          | Chlorpromazine | Yes    | No        | No  |
| Clark 1970a <sup>61</sup>        | 1970 | 14          | Placebo        | Yes    | No        | No  |

1  
2  
3  
4  
5  
6  
7  
8  
9  
10  
11  
12  
13  
14  
15  
16  
17  
18  
19  
20  
21  
22  
23  
24  
25  
26  
27  
28  
29  
30  
31  
32  
33  
34  
35  
36  
37  
38  
39  
40  
41  
42  
43  
44  
45  
46  
47  
48  
49  
50  
51  
52  
53  
54  
55  
56  
57  
58  
59  
60

**Supplementary Figures**

16

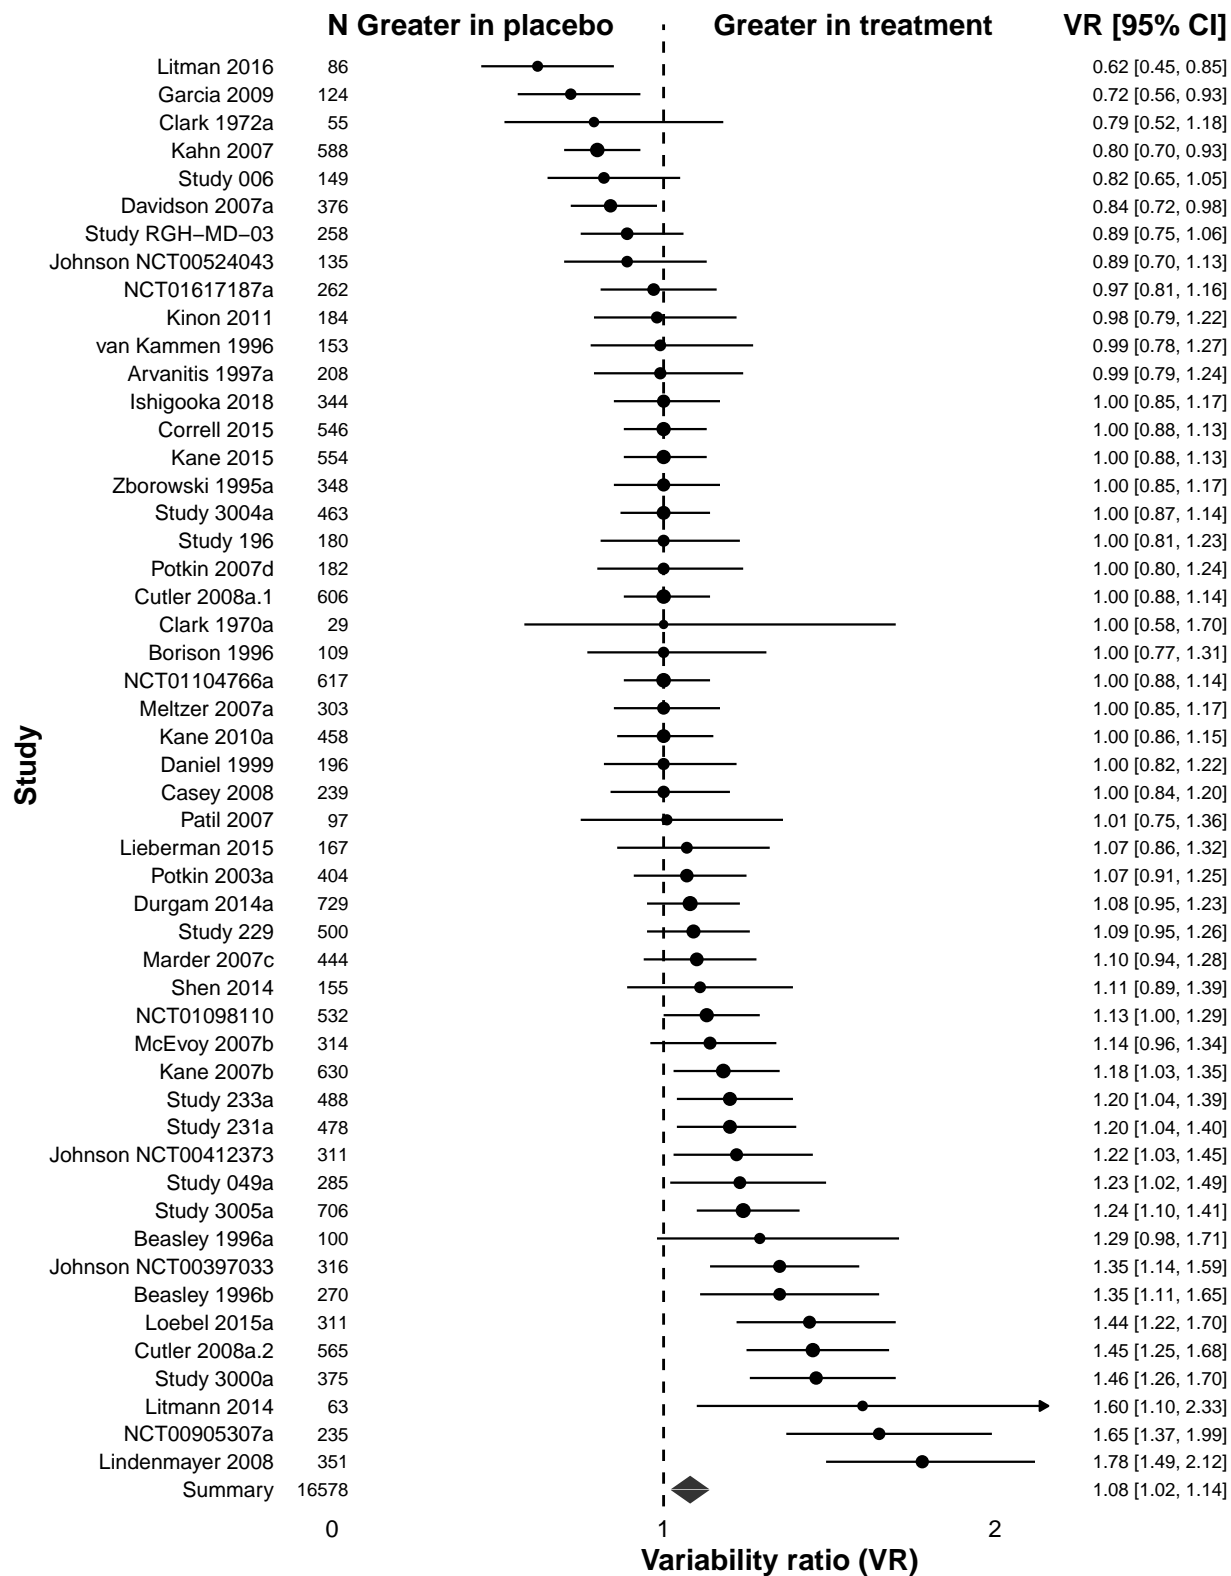

55 **Figure S1.** Variability ratio for weight gain. The forest plot shows the VR together with its 95% confidence interval (CI) for treatment  
56 versus placebo. All included studies<sup>41-95</sup> are also listed in Table S1.

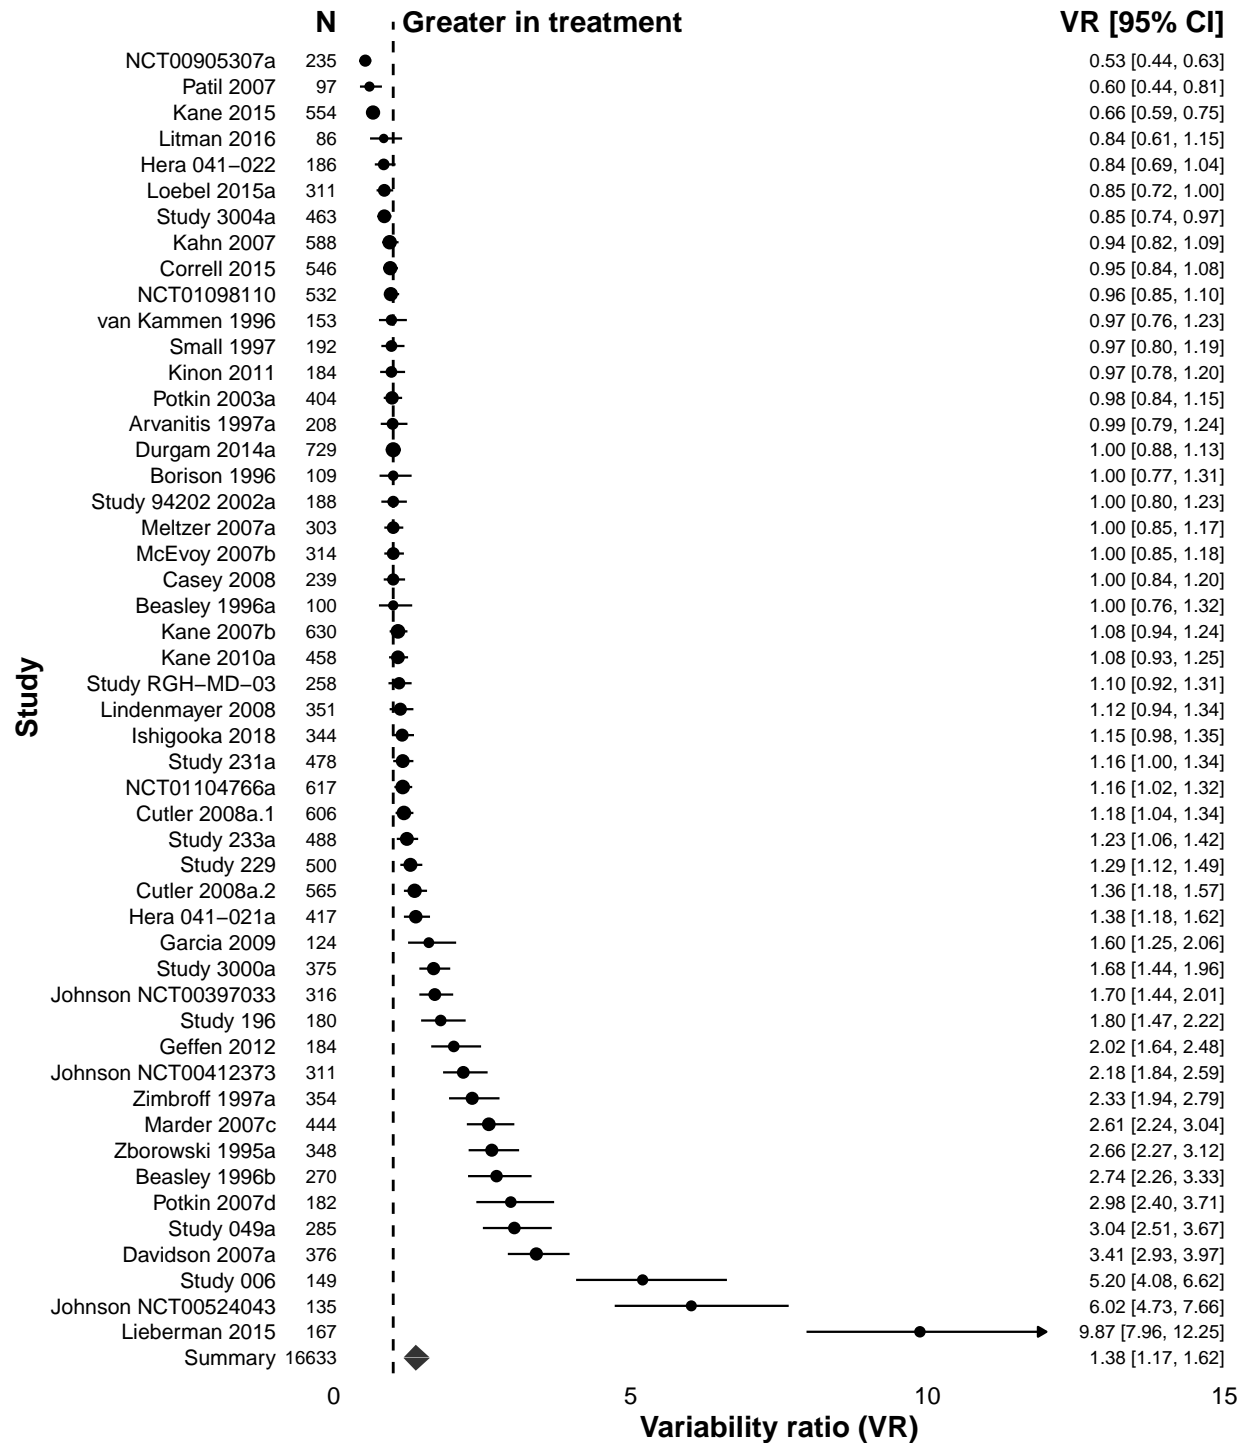

**Figure S2.** Variability ratio for hyperprolactinemia. The forest plot shows the VR together with its 95% confidence interval (CI) for treatment versus placebo. All included studies<sup>41,42,44-48,50-58,60,62,64,65,67-69,72,74-79,82-92,94-100</sup> are also listed in Table S1.

18

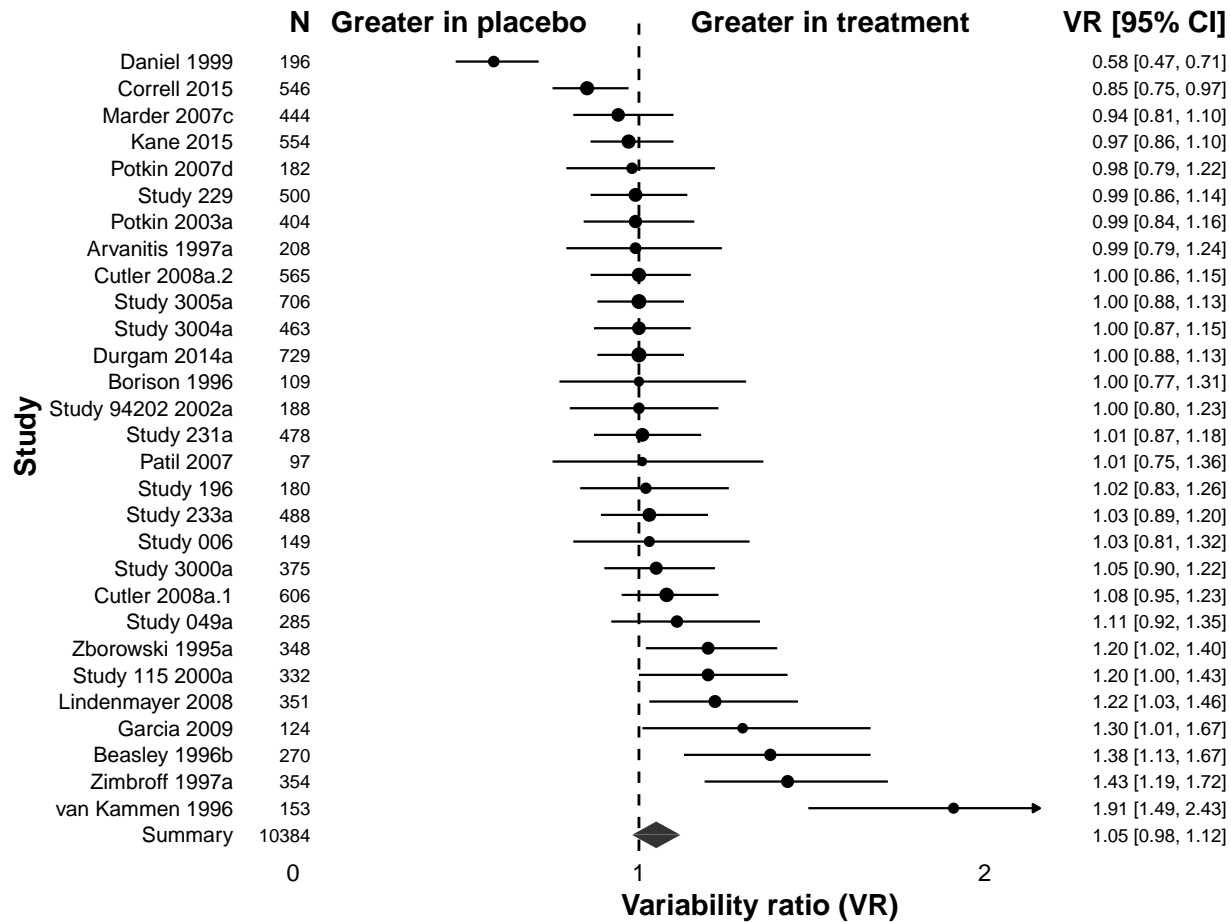

**Figure S3.** Variability ratio for QTc prolongation. The forest plot shows the VR together with its 95% confidence interval (CI) for treatment versus placebo. All included studies<sup>42,45,51,52,54-60,62,68,70,74,76-80,85,86,88,91,95,96,100</sup> are also listed in Table S1.
